# Supplementary material for: Global burden of periodontal disease and dietary risk correlation: A joint GBD–GDD analysis (1990–2018)
Source: Research Square preprint supplement (doi:10.21203/rs.3.rs-7400183/v1), 2025-09-18
Supplement: Supplementary file 1 [file 26cc99f8405491c862508e0e.docx]

| Country | EAPC (%) | 95% CI | P-value |
| --- | --- | --- | --- |
| Turkey | 2.93 | (2.46, 3.39) | 0.000 |
| Sierra Leone | 1.64 | (0.94, 2.34) | 0.000 |
| Lao People's Democratic Republic | 1.57 | (1.12, 2.03) | 0.000 |
| Bosnia and Herzegovina | 1.40 | (0.97, 1.83) | 0.000 |
| Australia | 1.14 | (0.61, 1.68) | 0.000 |
| France | 1.02 | (0.81, 1.22) | 0.000 |
| Socialist Republic of Viet Nam | 0.98 | (0.69, 1.27) | 0.000 |
| New Zealand | 0.85 | (0.54, 1.16) | 0.000 |
| Cambodia | 0.78 | (0.65, 0.90) | 0.000 |
| Egypt | 0.77 | (0.69, 0.85) | 0.000 |
| Lesotho | 0.73 | (0.71, 0.75) | 0.000 |
| Albania | 0.70 | (0.36, 1.04) | 0.000 |
| Tunisia | 0.68 | (0.58, 0.78) | 0.000 |
| Sudan | 0.59 | (0.55, 0.62) | 0.000 |
| Iraq | 0.55 | (0.47, 0.62) | 0.000 |
| Jordan | 0.55 | (0.48, 0.62) | 0.000 |
| Lebanon | 0.55 | (0.47, 0.62) | 0.000 |
| Ireland | 0.54 | (0.08, 1.01) | 0.023 |
| Croatia | 0.53 | (0.22, 0.85) | 0.001 |
| Brazil | 0.53 | (0.15, 0.90) | 0.007 |
| Palestine | 0.48 | (0.38, 0.58) | 0.000 |
| Oman | 0.48 | (0.42, 0.54) | 0.000 |
| Kingdom of Eswatini | 0.47 | (0.45, 0.50) | 0.000 |
| Romania | 0.46 | (0.12, 0.80) | 0.008 |
| Afghanistan | 0.46 | (0.37, 0.54) | 0.000 |
| Syrian Arab Republic | 0.40 | (0.32, 0.49) | 0.000 |
| Slovakia | 0.36 | (0.09, 0.63) | 0.009 |
| China | 0.36 | (0.02, 0.69) | 0.038 |
| Poland | 0.34 | (0.09, 0.58) | 0.007 |
| Namibia | 0.34 | (0.13, 0.54) | 0.002 |
| Bahrain | 0.33 | (0.26, 0.41) | 0.000 |
| Bulgaria | 0.29 | (-0.02, 0.60) | 0.064 |
| Qatar | 0.29 | (0.20, 0.38) | 0.000 |
| Hungary | 0.29 | (-0.21, 0.78) | 0.255 |
| Algeria | 0.28 | (0.21, 0.34) | 0.000 |
| Argentina | 0.27 | (-0.07, 0.62) | 0.118 |
| Panama | 0.27 | (0.08, 0.46) | 0.007 |
| Republic of Korea | 0.26 | (-0.33, 0.85) | 0.381 |
| El Salvador | 0.26 | (0.09, 0.42) | 0.003 |
| Thailand | 0.26 | (0.00, 0.51) | 0.047 |
| Kuwait | 0.25 | (0.19, 0.31) | 0.000 |
| Trinidad and Tobago | 0.24 | (0.10, 0.38) | 0.001 |
| Greece | 0.24 | (-0.14, 0.62) | 0.213 |
| Islamic Republic of Iran | 0.24 | (0.05, 0.42) | 0.015 |
| Peru | 0.23 | (0.00, 0.47) | 0.046 |
| Ecuador | 0.23 | (0.05, 0.41) | 0.014 |
| Bhutan | 0.23 | (0.16, 0.30) | 0.000 |
| Saudi Arabia | 0.22 | (0.05, 0.40) | 0.014 |
| Republic of Cabo Verde | 0.22 | (0.18, 0.25) | 0.000 |
| North Macedonia | 0.22 | (-0.15, 0.58) | 0.240 |
| Sweden | 0.21 | (0.15, 0.27) | 0.000 |
| Yemen | 0.21 | (0.04, 0.38) | 0.017 |
| Pakistan | 0.19 | (0.12, 0.27) | 0.000 |
| Uruguay | 0.19 | (0.07, 0.30) | 0.002 |
| Lithuania | 0.18 | (0.07, 0.29) | 0.002 |
| Serbia | 0.18 | (-0.18, 0.53) | 0.319 |
| Bangladesh | 0.17 | (0.10, 0.23) | 0.000 |
| Montenegro | 0.16 | (-0.18, 0.50) | 0.359 |
| Estonia | 0.15 | (0.11, 0.19) | 0.000 |
| India | 0.15 | (0.07, 0.23) | 0.000 |
| Czech Republic | 0.15 | (-0.12, 0.42) | 0.282 |
| Ethiopia | 0.14 | (0.07, 0.22) | 0.001 |
| Singapore | 0.14 | (-0.42, 0.70) | 0.622 |
| Norway | 0.14 | (-0.01, 0.28) | 0.066 |
| Bermuda | 0.13 | (0.04, 0.23) | 0.007 |
| Colombia | 0.12 | (-0.04, 0.29) | 0.136 |
| Mali | 0.12 | (0.07, 0.18) | 0.000 |
| Nicaragua | 0.12 | (-0.07, 0.30) | 0.201 |
| Ghana | 0.12 | (0.06, 0.18) | 0.000 |
| Indonesia | 0.11 | (-0.04, 0.26) | 0.139 |
| Mexico | 0.11 | (-0.07, 0.28) | 0.237 |
| Iceland | 0.09 | (-0.04, 0.21) | 0.179 |
| Taiwan (Province of China) | 0.08 | (-0.02, 0.17) | 0.105 |
| Canada | 0.07 | (-0.19, 0.33) | 0.596 |
| Latvia | 0.07 | (0.01, 0.12) | 0.012 |
| Burkina Faso | 0.07 | (0.03, 0.10) | 0.002 |
| Finland | 0.06 | (-0.26, 0.38) | 0.730 |
| Costa Rica | 0.05 | (-0.13, 0.23) | 0.580 |
| Guatemala | 0.04 | (-0.19, 0.27) | 0.735 |
| Bolivarian Republic of Venezuela | 0.04 | (-0.13, 0.21) | 0.677 |
| United Kingdom of Great Britain and Northern Ireland | 0.03 | (-0.31, 0.37) | 0.850 |
| United Arab Emirates | 0.01 | (-0.08, 0.10) | 0.871 |
| Honduras | -0.01 | (-0.23, 0.21) | 0.932 |
| Chile | -0.02 | (-0.50, 0.46) | 0.926 |
| Belarus | -0.02 | (-0.15, 0.10) | 0.695 |
| Morocco | -0.03 | (-0.19, 0.13) | 0.729 |
| Cameroon | -0.04 | (-0.09, 0.01) | 0.109 |
| Greenland | -0.04 | (-0.33, 0.25) | 0.776 |
| Slovenia | -0.05 | (-0.29, 0.20) | 0.704 |
| Liberia | -0.05 | (-0.12, 0.02) | 0.154 |
| Mongolia | -0.08 | (-0.26, 0.10) | 0.400 |
| American Samoa | -0.09 | (-0.14, -0.04) | 0.001 |
| Guinea | -0.10 | (-0.16, -0.05) | 0.000 |
| Dominican Republic | -0.15 | (-0.32, 0.02) | 0.081 |
| Denmark | -0.15 | (-0.24, -0.07) | 0.001 |
| Andorra | -0.16 | (-0.30, -0.02) | 0.025 |
| Plurinational State of Bolivia | -0.17 | (-0.39, 0.06) | 0.153 |
| Republic of the Gambia | -0.17 | (-0.31, -0.02) | 0.026 |
| Kenya | -0.17 | (-0.24, -0.10) | 0.000 |
| Italy | -0.17 | (-0.40, 0.06) | 0.148 |
| Libya | -0.18 | (-0.27, -0.10) | 0.000 |
| Turkmenistan | -0.19 | (-0.39, 0.01) | 0.061 |
| Azerbaijan | -0.19 | (-0.44, 0.05) | 0.115 |
| Grenada | -0.20 | (-0.33, -0.06) | 0.004 |
| Kazakhstan | -0.20 | (-0.37, -0.04) | 0.014 |
| Japan | -0.21 | (-0.74, 0.33) | 0.447 |
| United States Virgin Islands | -0.22 | (-0.34, -0.10) | 0.000 |
| Armenia | -0.23 | (-0.41, -0.06) | 0.010 |
| Paraguay | -0.25 | (-0.54, 0.04) | 0.094 |
| Netherlands | -0.26 | (-0.48, -0.04) | 0.024 |
| Guyana | -0.26 | (-0.42, -0.11) | 0.001 |
| Cuba | -0.26 | (-0.48, -0.05) | 0.017 |
| Switzerland | -0.27 | (-0.45, -0.08) | 0.005 |
| Puerto Rico | -0.27 | (-0.37, -0.18) | 0.000 |
| Saint Vincent and the Grenadines | -0.27 | (-0.41, -0.13) | 0.000 |
| Republic of Moldova | -0.28 | (-0.44, -0.12) | 0.001 |
| Suriname | -0.30 | (-0.45, -0.14) | 0.000 |
| Saint Kitts and Nevis | -0.30 | (-0.44, -0.15) | 0.000 |
| Commonwealth of the Bahamas | -0.31 | (-0.47, -0.16) | 0.000 |
| Nepal | -0.32 | (-0.65, 0.02) | 0.065 |
| Russian Federation | -0.32 | (-0.36, -0.29) | 0.000 |
| Belize | -0.35 | (-0.49, -0.20) | 0.000 |
| Dominica | -0.36 | (-0.50, -0.21) | 0.000 |
| Saint Lucia | -0.38 | (-0.53, -0.24) | 0.000 |
| Georgia | -0.39 | (-0.56, -0.22) | 0.000 |
| Antigua and Barbuda | -0.39 | (-0.52, -0.26) | 0.000 |
| Belgium | -0.40 | (-0.57, -0.23) | 0.000 |
| Democratic People's Republic of Korea | -0.40 | (-0.53, -0.28) | 0.000 |
| Malta | -0.41 | (-0.58, -0.24) | 0.000 |
| Luxembourg | -0.42 | (-0.59, -0.24) | 0.000 |
| Jamaica | -0.43 | (-0.58, -0.28) | 0.000 |
| Uzbekistan | -0.45 | (-0.66, -0.24) | 0.000 |
| Sao Tome and Principe | -0.45 | (-0.66, -0.25) | 0.000 |
| Austria | -0.46 | (-0.65, -0.28) | 0.000 |
| Ukraine | -0.48 | (-0.53, -0.44) | 0.000 |
| Zimbabwe | -0.51 | (-0.60, -0.42) | 0.000 |
| Portugal | -0.51 | (-0.69, -0.34) | 0.000 |
| Barbados | -0.52 | (-0.64, -0.39) | 0.000 |
| Brunei Darussalam | -0.54 | (-1.07, -0.02) | 0.044 |
| Cyprus | -0.59 | (-0.76, -0.42) | 0.000 |
| Germany | -0.66 | (-1.06, -0.27) | 0.002 |
| Guinea-Bissau | -0.67 | (-0.90, -0.43) | 0.000 |
| Israel | -0.67 | (-0.86, -0.48) | 0.000 |
| Togo | -0.67 | (-0.90, -0.44) | 0.000 |
| Haiti | -0.70 | (-0.87, -0.52) | 0.000 |
| Republic of San Marino | -0.70 | (-0.84, -0.57) | 0.000 |
| Mauritania | -0.74 | (-0.93, -0.55) | 0.000 |
| Chad | -0.76 | (-0.96, -0.55) | 0.000 |
| Equatorial Guinea | -0.77 | (-1.11, -0.42) | 0.000 |
| Benin | -0.79 | (-1.00, -0.58) | 0.000 |
| United States of America | -0.83 | (-1.32, -0.35) | 0.001 |
| Principality of Monaco | -0.84 | (-0.99, -0.69) | 0.000 |
| Republic of C?te d'Ivoire | -0.84 | (-1.03, -0.65) | 0.000 |
| Tajikistan | -0.91 | (-1.24, -0.57) | 0.000 |
| Senegal | -0.99 | (-1.22, -0.77) | 0.000 |
| Kyrgyzstan | -1.00 | (-1.23, -0.77) | 0.000 |
| South Africa | -1.44 | (-1.65, -1.23) | 0.000 |
| Myanmar | -1.50 | (-1.80, -1.19) | 0.000 |
| Botswana | -1.50 | (-1.85, -1.15) | 0.000 |
| Mauritius | -1.72 | (-2.19, -1.24) | 0.000 |
| Zambia | -1.75 | (-2.20, -1.29) | 0.000 |
| Timor-Leste | -1.88 | (-2.22, -1.54) | 0.000 |
| Maldives | -1.98 | (-2.32, -1.64) | 0.000 |
| Angola | -2.00 | (-2.31, -1.69) | 0.000 |
| Gabon | -2.06 | (-2.36, -1.76) | 0.000 |
| Malaysia | -2.08 | (-2.50, -1.65) | 0.000 |
| Niger | -2.13 | (-2.89, -1.36) | 0.000 |
| Seychelles | -2.17 | (-2.54, -1.79) | 0.000 |
| Congo | -2.27 | (-2.60, -1.93) | 0.000 |
| Eritrea | -2.63 | (-3.07, -2.18) | 0.000 |
| United Republic of Tanzania | -2.73 | (-3.16, -2.30) | 0.000 |
| Mozambique | -2.81 | (-3.30, -2.33) | 0.000 |
| Djibouti | -2.85 | (-3.26, -2.43) | 0.000 |
| Rwanda | -2.86 | (-3.30, -2.42) | 0.000 |
| Uganda | -2.86 | (-3.38, -2.34) | 0.000 |
| Comoros | -2.95 | (-3.39, -2.51) | 0.000 |
| South Sudan | -3.04 | (-3.49, -2.58) | 0.000 |
| Central African Republic | -3.09 | (-3.50, -2.67) | 0.000 |
| Malawi | -3.16 | (-3.64, -2.68) | 0.000 |
| Democratic Republic of the Congo | -3.28 | (-3.65, -2.90) | 0.000 |
| Burundi | -3.50 | (-3.99, -3.00) | 0.000 |
| Somalia | -4.16 | (-4.78, -3.54) | 0.000 |
| Cook Islands | -4.21 | (-5.31, -3.09) | 0.000 |
| Philippines | -4.33 | (-4.69, -3.96) | 0.000 |
| Sri Lanka | -4.45 | (-5.09, -3.79) | 0.000 |
| Nigeria | -5.89 | (-6.46, -5.31) | 0.000 |
| Republic of Palau | -5.98 | (-7.07, -4.88) | 0.000 |
| Tokelau | -6.00 | (-7.16, -4.82) | 0.000 |
| Guam | -6.20 | (-7.10, -5.29) | 0.000 |
| Spain | -6.38 | (-7.67, -5.08) | 0.000 |
| Madagascar | -6.43 | (-7.59, -5.25) | 0.000 |
| Northern Mariana Islands | -6.74 | (-7.73, -5.73) | 0.000 |
| Fiji | -7.09 | (-8.18, -5.99) | 0.000 |
| Republic of Niue | -7.11 | (-8.04, -6.17) | 0.000 |
| Vanuatu | -7.21 | (-8.27, -6.14) | 0.000 |
| Tuvalu | -7.28 | (-8.41, -6.13) | 0.000 |
| Republic of Nauru | -7.30 | (-8.54, -6.04) | 0.000 |
| Samoa | -7.44 | (-8.38, -6.48) | 0.000 |
| Marshall Islands | -7.50 | (-8.63, -6.36) | 0.000 |
| Tonga | -7.52 | (-8.49, -6.54) | 0.000 |
| Solomon Islands | -7.52 | (-8.65, -6.38) | 0.000 |
| Kiribati | -7.68 | (-8.83, -6.53) | 0.000 |
| Federated States of Micronesia | -7.72 | (-8.70, -6.73) | 0.000 |
| Papua New Guinea | -7.74 | (-8.75, -6.71) | 0.000 |

**Supplementary Table 1. Estimated Annual Percentage Change (EAPC) in periodontal DALYs from 1990 to 2018 for the top 30 countries.**

| Variable | Coef | CI | P-value |
| --- | --- | --- | --- |
| Protective Score | -1.05 | (-1.52, -0.58) | 0.002 |
| Risk Score | 0.87 | (0.30, 1.44) | 0.018 |

**Supplementary Table 2. Multivariable regression analysis of dietary scores and periodontal DALYs**

| Variable | Coef. | 95% CI | P-value |
| --- | --- | --- | --- |
| Sex[T.Male] | 5.35 | (4.07, 6.62) | 0.000 |
| WHO_region[T.AMRO] | 0.87 | (-11.50, 13.23) | 0.891 |
| WHO_region[T.EMRO] | -10.74 | (-24.25, 2.78) | 0.119 |
| WHO_region[T.EURO] | -14.64 | (-26.22, -3.06) | 0.013 |
| WHO_region[T.SEARO] | -15.47 | (-33.23, 2.30) | 0.088 |
| WHO_region[T.WPRO] | -41.31 | (-55.76, -26.86) | 0.000 |
| Standardized SDI | -2.26 | (-2.63, -1.89) | 0.000 |
| protective_score | -0.01 | (-0.17, 0.15) | 0.900 |
| risk_score | -0.02 | (-0.14, 0.10) | 0.760 |
| Group Var | 3.44 | (2.63, 4.25) | 0.000 |

**Supplementary Table 3. Estimates from the multivariable linear mixed-effects model**

**
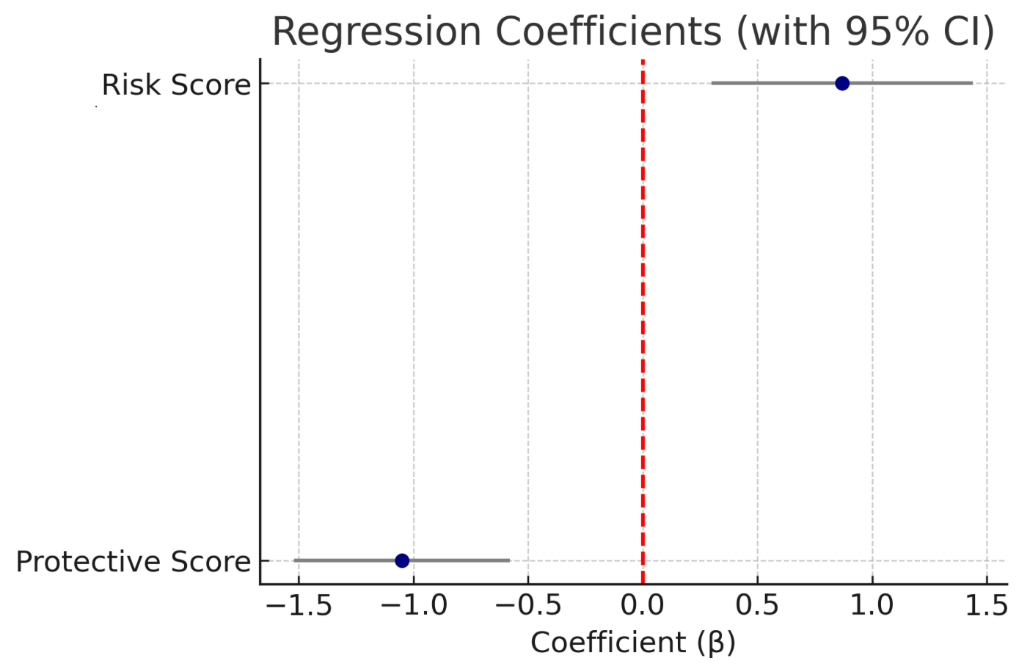
**

**Supplementary Figure 1. Forest plot showing the regression coefficients (β) and 95% confidence intervals (CI) for the associations between dietary pattern scores and periodontal DALYs.**


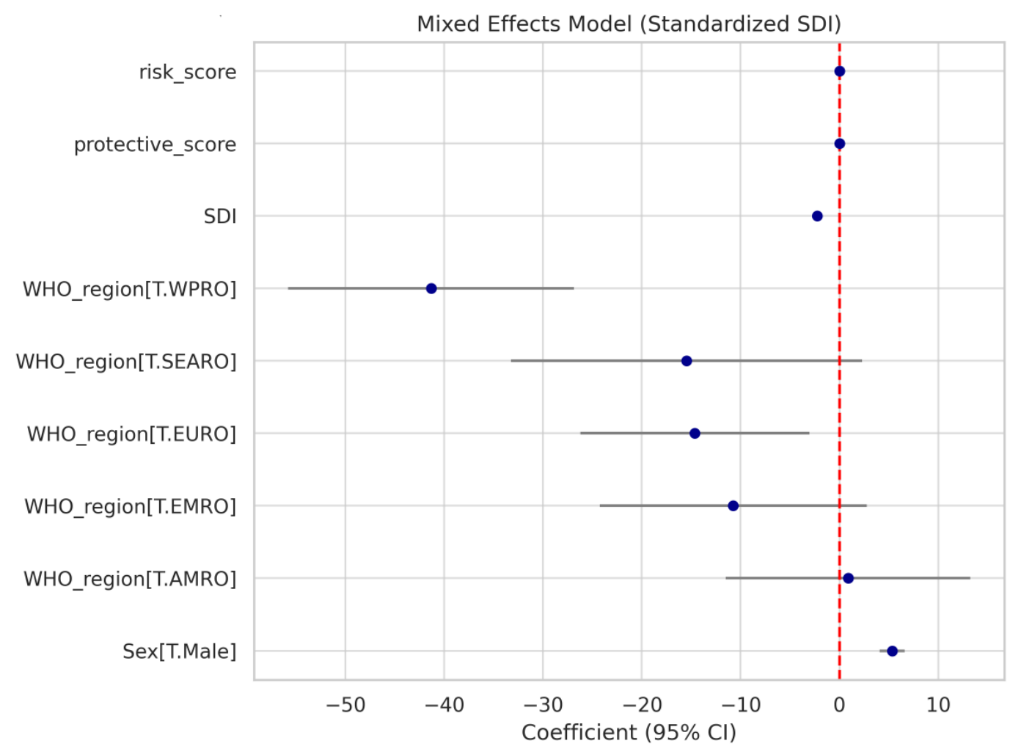


**Supplementary Figure 2. Forest plot of the multivariable linear mixed-effects model**


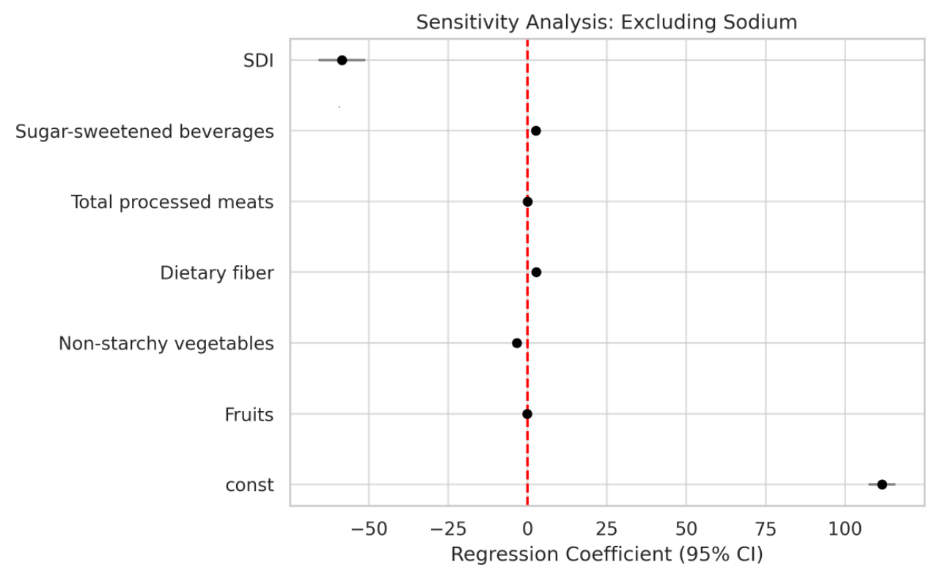


**Supplementary Figure 3. Sensitivity analysis excluding dietary sodium from the regression model.**
